# Supplementary material
Source: PubMed Central journal article supplement (PMC4217410)
Supplement: pnas.201406251SI.pdf [file pnas.201406251SI.pdf]

# Supporting Information

Gout et al. 10.1073/pnas.1406251111

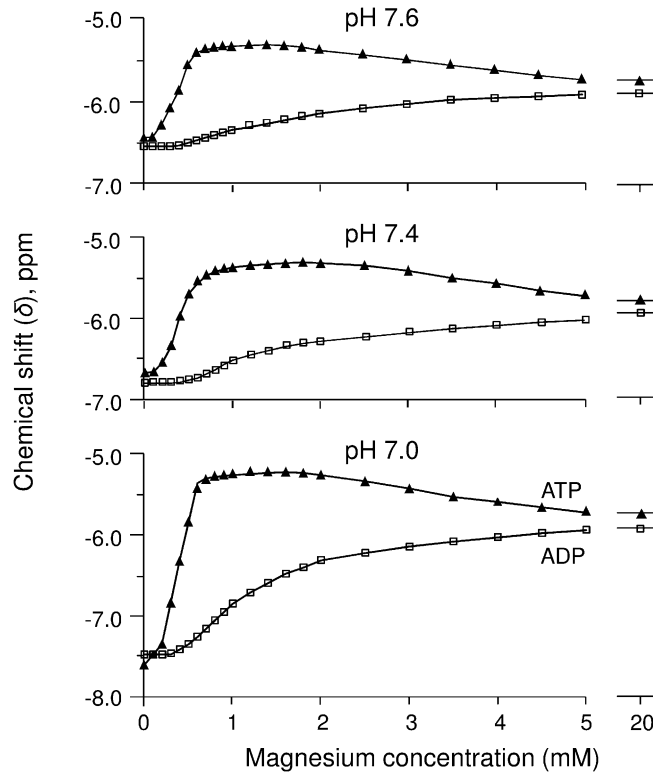

**Fig. S1.** Calibration curves linking  $\gamma$ -ATP and  $\beta$ -ADP chemical shifts to  $[\text{MgSO}_4]$  at different pH values. Solutions containing 0.6 mM ATP, 0.15 mM ADP, 150 mM  $\text{KNO}_3$ , and 20 mM Hepes buffer at pH 7.0, 7.4, and 7.6 were analyzed in a 10-mm NMR tube by  $^{31}\text{P}$ -NMR. Acquisition time, 15 min (1,500 scans). The total magnesium concentrations corresponding to the midpoints used to calculate  $K_d$  values were  $335 \pm 3 \mu\text{M}$  for ATP and  $1,345 \pm 50 \mu\text{M}$  for ADP, at the three pH values tested. A detailed description of how  $[\text{ATP}]$ ,  $[\text{MgATP}]$ ,  $[\text{ADP}]$ ,  $[\text{MgADP}]$ , and  $[\text{Mg}^{2+}]$  were calculated from the chemical shift data is provided given in *Materials and Methods*.

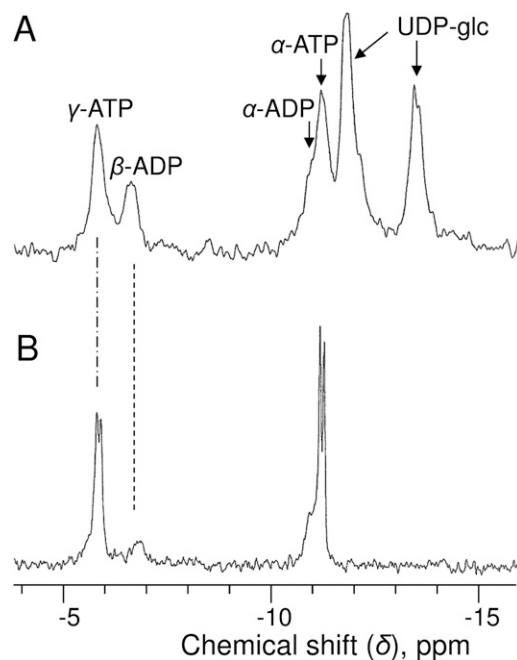

**Fig. S2.** Enlarged portions of in vivo/in vitro proton-decoupled  $^{31}\text{P}$ -NMR spectra of hypoxic sycamore cells (A) and a solution of ATP + ADP (B). Experimental conditions were as follows. (A) Cells were harvested at 5 d after subculture in standard medium and perfused in a 25-mm NMR tube at 20 °C, with NM containing 50  $\mu\text{M}$  Pi at pH 6.0. The  $\text{O}_2$  bubbling in perfusing NM was replaced by  $\text{N}_2$  bubbling 5 min before acquisition. Acquisition time, 20 min (2,000 scans). (B) A solution of 0.6 mM ATP + 0.15 mM ADP containing 1.1 mM  $\text{MgSO}_4$ , 150 mM  $\text{KNO}_3$ , and 20 mM HEPES buffer (pH 6.8) was perfused in a 10-mm NMR tube. Acquisition time, 15 min (1,500 scans). This in vitro simulation fit the in vivo spectrum.

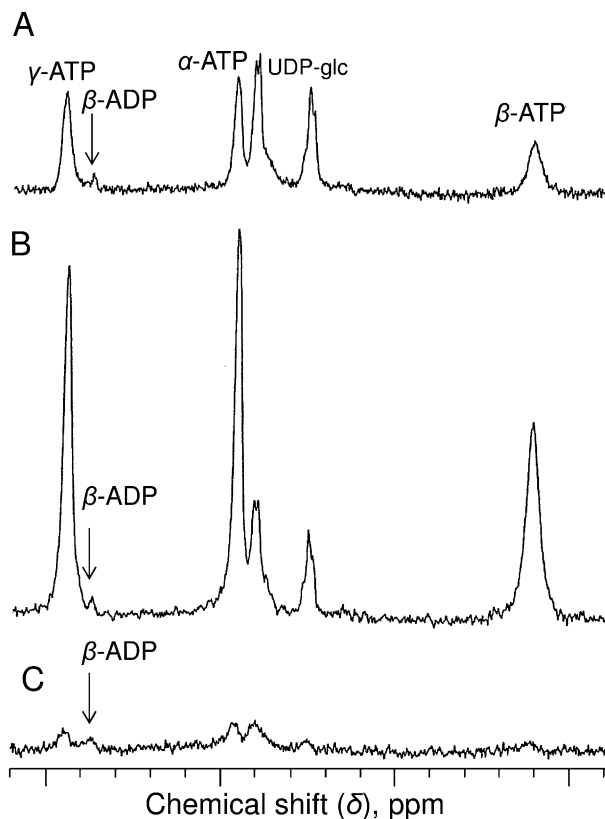

**Fig. S3.** Enlarged portions of in vivo proton-decoupled  $^{31}\text{P}$ -NMR spectra of sycamore cells. (A) Cells harvested in standard NM at 5 d after subculture and perfused in a 25-mm NMR tube with a well-oxygenated diluted NM. (B) Cells preincubated in adenine-supplied NM for 12 h and perfused in the presence of 1 mM adenine. (C) Cells preincubated in a Pi-free NM for 5 d and perfused with a Pi-free NM. Acquisition time, 16 h (96,000 scans). The 16-h spectrum is the sum of four successive 4-h blocks showing no change across the 16-h time course of the experiment.

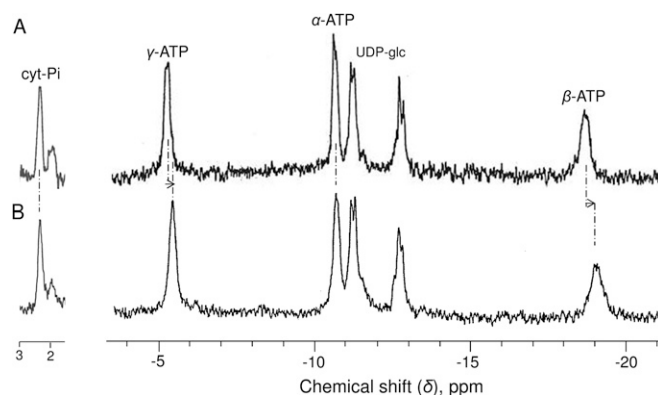

**Fig. 54.** Enlarged portions of in vivo proton-decoupled  $^{31}\text{P}$ -NMR spectra of sycamore cells. (A) Spectrum accumulated 1 h after the addition of 1 mM  $\text{MgSO}_4$  to the nutrient medium of 2-wk Mg-deprived cells. Acquisition time, 1 h (6,000 scans). (B) Spectrum accumulated 2 h later. Acquisition time, 2 h (12,000 scans). Horizontal arrows indicate the upfield shift (toward the right of the spectra) of the  $\gamma$ - and  $\beta$ -ATP resonance peaks after the first hour of recovery. Note that just before the addition of  $\text{Mg}^{2+}$ , the chemical shifts of  $\beta$ -ATP and  $\gamma$ -ATP were  $-19.5$  and  $-5.9$  ppm, respectively (Fig. 6A), which are even more upfield than those shown in B. This suggests that the massive influx of  $\text{Mg}^{2+}$  transiently saturated ATP in the cytosol to equilibrate within the storage compartments (vacuole).

**Table S1. Phosphorylation rate of 1 mM adenine, 0.1 mM choline, and 50 mM glycerol by standard and 2-wk Mg-deprived sycamore cells**

|                                        | ATP           | P-choline    | Glycerol 3-P |
|----------------------------------------|---------------|--------------|--------------|
| + $\text{Mg}^{2+}$ (standard cells)    | $28 \pm 3$    | $600 \pm 50$ | $950 \pm 90$ |
| - $\text{Mg}^{2+}$ (Mg-deprived cells) | $2.0 \pm 0.5$ | $20 \pm 5$   | $25 \pm 5$   |

Measurements were performed from 1-h in vivo proton-decoupled  $^{31}\text{P}$ -NMR spectra. Values correspond to nmol of phosphorylated compound  $\text{h}^{-1} \text{g}^{-1}$  cell wet weight, and are reported as mean  $\pm$  SD ( $n = 5$ ).

**Table S2. Cytosolic concentration of free-magnesium in sycamore cells measured from the chemical shifts of  $\beta$ -ATP,  $\gamma$ -ATP, and  $\beta$ -ADP signals after 1 h and 16 h of data accumulation**

|                           | From $\delta_{\gamma\text{-ATP}}$ | From $\delta_{\beta\text{-ATP}}$ | From $\delta_{\beta\text{-ADP}}$ |
|---------------------------|-----------------------------------|----------------------------------|----------------------------------|
| After 1 h, $\mu\text{M}$  | $250 \pm 30$                      | $270 \pm 60$                     | —                                |
| After 16 h, $\mu\text{M}$ | $250 \pm 20$                      | $260 \pm 30$                     | $250 \pm 30$                     |

Concentrations were measured as indicated in *Materials and Methods*. The data accumulation times of in vivo  $^{31}\text{P}$ -NMR spectra were 1 h (6,000 scans) and 16 h (96,000 scans). Values are mean  $\pm$  SD ( $n = 5$ ).
